# Supplementary material for: A systematic investigation of the formation of ordered mesoporous silicas using poly(ethylene oxide)-b-poly(methyl methacrylate) as the template
Source: Royal Society of Chemistry journal article supplement (doi:10.1039/c3ta11469d), 2013-01-01
Supplement: c3ta11469d.pdf [file c3ta11469d.pdf]

## Supporting Information

### **A Systematic Investigation of the Formation of Ordered Mesoporous Silicas Using Poly(ethylene oxide)-*b*-poly(methyl methacrylate) as the Template**

Jing Wei, Yuhui Li, Minghong Wang, Qin Yue, Zhenkun Sun, Chun Wang, Yujuan  
Zhao, Yonghui Deng\*, Dongyuan Zhao

Department of Chemistry, Shanghai Key Laboratory of Molecular Catalysis and Innovative Materials,  
Advanced Materials Lab, Fudan University, Shanghai 200433, China.

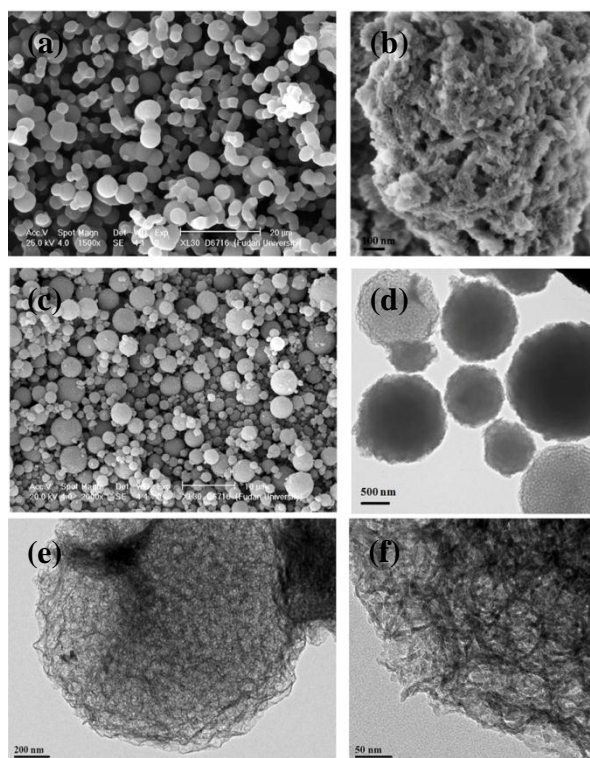

**Figure S1.** SEM images of the silica nanostructures synthesized with different solvent as the additive, (a) *i*-propanol, (b) CH<sub>2</sub>Cl<sub>2</sub>, and (c) DMF. TEM images of silica nanostructure synthesized in the presence of DMF (d - e).
